# Supplementary material for: The role of electrostatic induction in secondary isotope effects on acidity: theory and computational confirmation
Source: Royal Society of Chemistry journal article supplement (doi:10.1039/c4nj00221k), 2014-01-01
Supplement: c4nj00221k1.pdf [file c4nj00221k1.pdf]

## Supplementary Information for “The Role of Electrostatic Induction in Secondary Isotope Effects on Acidity: Theory and Computational Confirmation”, by E. Amitai Halevi, New Journal of Chemistry, ....

### Cartesian Matrices of all structures computed (Standard Orientation)

(The hydrates are labeled by the Structure number)

#### Formate Ion

##### Formate ion (anhydrous):

| Center Number | Atomic Number | Atomic Type | Coordinates (Angstroms) |   |   |
|---------------|---------------|-------------|-------------------------|---|---|
|               |               |             | X                       | Y | Z |

|   |   |   |          |           |           |
|---|---|---|----------|-----------|-----------|
| 1 | 1 | 0 | 0.000000 | 0.000000  | 1.457755  |
| 2 | 6 | 0 | 0.000000 | 0.000000  | 0.308455  |
| 3 | 8 | 0 | 0.000000 | 1.141068  | -0.206780 |
| 4 | 8 | 0 | 0.000000 | -1.141068 | -0.206780 |

##### Formate ion monohydrate (1)

|   |   |   |           |           |          |
|---|---|---|-----------|-----------|----------|
| 1 | 1 | 0 | -0.002187 | 2.260990  | 0.000000 |
| 2 | 6 | 0 | 0.000000  | 1.128460  | 0.000000 |
| 3 | 8 | 0 | -1.139827 | 0.600502  | 0.000000 |
| 4 | 8 | 0 | 1.140890  | 0.603663  | 0.000000 |
| 5 | 1 | 0 | -0.709044 | -1.335090 | 0.000000 |
| 6 | 8 | 0 | -0.001282 | -1.998421 | 0.000000 |
| 7 | 1 | 0 | 0.712979  | -1.342610 | 0.000000 |

##### Formate ion dihydrate-a (2)

|    |   |   |           |           |           |
|----|---|---|-----------|-----------|-----------|
| 1  | 1 | 0 | -0.000183 | 0.609669  | -0.000203 |
| 2  | 6 | 0 | -0.000032 | -0.516727 | -0.000062 |
| 3  | 8 | 0 | 1.129414  | -1.057704 | 0.098019  |
| 4  | 8 | 0 | -1.129407 | -1.057922 | -0.097981 |
| 5  | 1 | 0 | 2.297484  | 0.207884  | 0.156221  |
| 6  | 1 | 0 | -2.297282 | 0.208120  | -0.156282 |
| 7  | 8 | 0 | 2.838996  | 1.022726  | 0.033779  |
| 8  | 8 | 0 | -2.838924 | 1.022825  | -0.033785 |
| 9  | 1 | 0 | 2.490011  | 1.317819  | -0.807640 |
| 10 | 1 | 0 | -2.490466 | 1.317469  | 0.808013  |

##### Formate ion dihydrate-b (3)

|    |   |   |           |           |           |
|----|---|---|-----------|-----------|-----------|
| 1  | 1 | 0 | 2.336714  | -1.151540 | -0.159666 |
| 2  | 6 | 0 | 1.432388  | -0.495471 | -0.023855 |
| 3  | 8 | 0 | 0.554594  | -0.941996 | 0.760801  |
| 4  | 8 | 0 | 1.453863  | 0.578954  | -0.672583 |
| 5  | 1 | 0 | -0.762247 | 0.921522  | 0.985497  |
| 6  | 8 | 0 | -0.848382 | 1.642477  | 0.351416  |
| 7  | 1 | 0 | -0.031138 | 1.436793  | -0.152971 |
| 8  | 1 | 0 | -1.915470 | 0.037273  | -0.459891 |
| 9  | 8 | 0 | -2.039221 | -0.918343 | -0.442698 |
| 10 | 1 | 0 | -1.189020 | -1.159963 | -0.045337 |

**Formate ion trihydrate-a (4)**

|    |   |   |           |           |           |
|----|---|---|-----------|-----------|-----------|
| 1  | 1 | 0 | -0.002420 | -1.266592 | 0.000209  |
| 2  | 6 | 0 | -0.000451 | -0.148555 | -0.001563 |
| 3  | 8 | 0 | -1.127442 | 0.401257  | 0.108291  |
| 4  | 8 | 0 | 1.128573  | 0.396780  | -0.113140 |
| 5  | 1 | 0 | -2.317470 | -0.910174 | 0.180391  |
| 6  | 1 | 0 | 2.313381  | -0.919264 | -0.180230 |
| 7  | 8 | 0 | -2.826727 | -1.734573 | 0.034962  |
| 8  | 8 | 0 | 2.819264  | -1.745269 | -0.032067 |
| 9  | 1 | 0 | -2.566033 | -1.928225 | -0.865891 |
| 10 | 1 | 0 | 2.560936  | -1.932595 | 0.870812  |
| 11 | 1 | 0 | -0.708905 | 2.414937  | 0.074319  |
| 12 | 1 | 0 | 0.719065  | 2.411354  | -0.072813 |
| 13 | 8 | 0 | 0.006851  | 3.059540  | 0.002276  |

**Formate ion trihydrate-b (5)**

|    |   |   |           |           |           |
|----|---|---|-----------|-----------|-----------|
| 1  | 1 | 0 | -3.095688 | 0.000561  | 0.005667  |
| 2  | 6 | 0 | -1.974875 | 0.000205  | 0.003670  |
| 3  | 8 | 0 | -1.425906 | 0.017549  | 1.136996  |
| 4  | 8 | 0 | -1.430599 | -0.017709 | -1.132372 |
| 5  | 1 | 0 | 0.109519  | -1.276588 | 0.734581  |
| 6  | 8 | 0 | 0.580254  | -1.702161 | 0.003203  |
| 7  | 1 | 0 | 0.085971  | -1.273810 | -0.712344 |
| 8  | 1 | 0 | 0.103576  | 1.271864  | -0.738673 |
| 9  | 8 | 0 | 0.581349  | 1.702921  | -0.015155 |
| 10 | 1 | 0 | 0.096798  | 1.280333  | 0.709729  |
| 11 | 1 | 0 | 2.310609  | 0.735047  | -0.009885 |
| 12 | 8 | 0 | 2.936080  | -0.000972 | 0.005688  |
| 13 | 1 | 0 | 2.309044  | -0.735663 | 0.002037  |

**Formate ion tetrahydrate-a (6)**

|    |   |   |           |           |           |
|----|---|---|-----------|-----------|-----------|
| 1  | 1 | 0 | 3.688806  | -0.005911 | 0.002848  |
| 2  | 6 | 0 | 2.569954  | -0.003676 | 0.001089  |
| 3  | 8 | 0 | 2.022736  | 0.150107  | -1.123491 |
| 4  | 8 | 0 | 2.018810  | -0.155104 | 1.124237  |
| 5  | 1 | 0 | 0.442938  | -1.134394 | -0.859525 |
| 6  | 8 | 0 | 0.004457  | -1.642147 | -0.161863 |
| 7  | 1 | 0 | 0.524204  | -1.297985 | 0.582339  |
| 8  | 1 | 0 | 0.448981  | 1.135392  | 0.856320  |
| 9  | 8 | 0 | 0.011893  | 1.646891  | 0.160330  |
| 10 | 1 | 0 | 0.530479  | 1.302235  | -0.584357 |
| 11 | 1 | 0 | -1.806781 | -1.562729 | -0.034042 |
| 12 | 8 | 0 | -2.770157 | -1.452846 | 0.050424  |
| 13 | 1 | 0 | -2.828842 | -0.686702 | 0.626152  |
| 14 | 1 | 0 | -1.798612 | 1.563363  | 0.033285  |
| 15 | 8 | 0 | -2.762385 | 1.455301  | -0.049839 |
| 16 | 1 | 0 | -2.823732 | 0.691164  | -0.627941 |

**Formate ion tetrahydrate-b (7)**

|    |   |   |           |           |           |
|----|---|---|-----------|-----------|-----------|
| 1  | 1 | 0 | -1.757105 | 0.000066  | 0.000003  |
| 2  | 6 | 0 | -0.642986 | 0.000023  | 0.000004  |
| 3  | 8 | 0 | -0.097584 | -1.133057 | -0.047920 |
| 4  | 8 | 0 | -0.097496 | 1.133061  | 0.047922  |
| 5  | 1 | 0 | -1.462341 | -2.318612 | -0.078665 |
| 6  | 1 | 0 | -1.462160 | 2.318708  | 0.078669  |
| 7  | 8 | 0 | -2.306935 | -2.775935 | 0.097512  |
| 8  | 8 | 0 | -2.306725 | 2.776085  | -0.097515 |
| 9  | 1 | 0 | -2.452612 | -2.507233 | 1.005110  |
| 10 | 1 | 0 | -2.452430 | 2.507359  | -1.005103 |
| 11 | 1 | 0 | 1.709709  | -1.380510 | -0.185735 |
| 12 | 8 | 0 | 2.677415  | -1.413887 | -0.298601 |
| 13 | 1 | 0 | 2.827719  | -0.580050 | -0.750548 |
| 14 | 1 | 0 | 1.709814  | 1.380383  | 0.185707  |
| 15 | 8 | 0 | 2.677522  | 1.413706  | 0.298576  |
| 16 | 1 | 0 | 2.827749  | 0.579975  | 0.750745  |

---

**Formic Acid****Formic Acid (anhydrous)**

|   |   |   |           |           |          |
|---|---|---|-----------|-----------|----------|
| 1 | 1 | 0 | -0.387510 | 1.447337  | 0.000000 |
| 2 | 6 | 0 | 0.000000  | 0.420846  | 0.000000 |
| 3 | 8 | 0 | -1.034452 | -0.442361 | 0.000000 |
| 4 | 8 | 0 | 1.162518  | 0.111394  | 0.000000 |
| 5 | 1 | 0 | -0.637018 | -1.324681 | 0.000000 |

---

**Formic Acid monhydrate (8)**

|   |   |   |           |           |           |
|---|---|---|-----------|-----------|-----------|
| 1 | 1 | 0 | 2.282243  | 0.134535  | 0.041253  |
| 2 | 6 | 0 | 1.197474  | -0.027219 | 0.014457  |
| 3 | 8 | 0 | 0.555365  | 1.135314  | 0.001485  |
| 4 | 8 | 0 | 0.686537  | -1.129100 | -0.000127 |
| 5 | 1 | 0 | -0.408337 | 0.929851  | -0.022999 |
| 6 | 8 | 0 | -1.899205 | -0.005239 | -0.088506 |
| 7 | 1 | 0 | -2.453927 | -0.110297 | 0.686870  |
| 8 | 1 | 0 | -1.346393 | -0.798576 | -0.094691 |

---

**Formic Acid dihydrate (9)**

|    |   |   |           |           |           |
|----|---|---|-----------|-----------|-----------|
| 1  | 1 | 0 | -1.065089 | 1.284288  | -0.000876 |
| 2  | 6 | 0 | -0.174052 | 0.648823  | -0.005771 |
| 3  | 8 | 0 | -0.238559 | -0.570837 | -0.030560 |
| 4  | 8 | 0 | 0.938989  | 1.359550  | 0.018559  |
| 5  | 1 | 0 | 1.692663  | 0.721918  | 0.004550  |
| 6  | 8 | 0 | 2.584758  | -0.767309 | -0.071506 |
| 7  | 1 | 0 | 1.749614  | -1.252396 | -0.093091 |
| 8  | 1 | 0 | 3.053056  | -1.128593 | 0.683593  |
| 9  | 1 | 0 | -2.271557 | -0.731216 | -0.169247 |
| 10 | 8 | 0 | -3.132560 | -0.310012 | -0.071484 |
| 11 | 1 | 0 | -3.335397 | -0.478067 | 0.849624  |

---

**Formic Acid dihydrate (10)**

|    |   |   |           |           |           |
|----|---|---|-----------|-----------|-----------|
| 1  | 1 | 0 | -2.704011 | -0.695740 | -0.003486 |
| 2  | 6 | 0 | -1.639665 | -0.427056 | 0.004331  |
| 3  | 8 | 0 | -0.758984 | -1.265765 | 0.067831  |
| 4  | 8 | 0 | -1.492909 | 0.879785  | -0.063859 |
| 5  | 1 | 0 | -0.523935 | 1.120599  | -0.056551 |
| 6  | 8 | 0 | 1.052794  | 1.569972  | -0.054924 |
| 7  | 1 | 0 | 1.585582  | 0.750600  | -0.076467 |
| 8  | 1 | 0 | 1.373967  | 2.040010  | 0.716474  |
| 9  | 1 | 0 | 1.103931  | -1.221394 | 0.115690  |
| 10 | 8 | 0 | 2.028643  | -0.935610 | 0.049086  |
| 11 | 1 | 0 | 2.366103  | -1.418795 | -0.706719 |

---

**Formic Acid trihydrate (11)**

|    |   |   |           |           |           |
|----|---|---|-----------|-----------|-----------|
| 1  | 1 | 0 | -1.642580 | -1.345652 | 0.065025  |
| 2  | 6 | 0 | -0.664516 | -0.852651 | 0.070662  |
| 3  | 8 | 0 | 0.389426  | -1.457030 | 0.116374  |
| 4  | 8 | 0 | -0.816677 | 0.464195  | 0.019280  |
| 5  | 1 | 0 | 0.072373  | 0.924852  | 0.010427  |
| 6  | 8 | 0 | 1.484999  | 1.715785  | -0.031657 |
| 7  | 1 | 0 | 2.190851  | 1.041962  | -0.105496 |
| 8  | 1 | 0 | 1.732896  | 2.234168  | 0.735910  |
| 9  | 1 | 0 | 2.202356  | -0.990379 | 0.071480  |
| 10 | 8 | 0 | 3.021870  | -0.483658 | -0.038119 |
| 11 | 1 | 0 | 3.434499  | -0.872259 | -0.811059 |
| 12 | 8 | 0 | -3.729534 | 0.154772  | -0.169035 |
| 13 | 1 | 0 | -2.910875 | 0.634749  | -0.322770 |
| 14 | 1 | 0 | -3.893086 | 0.335955  | 0.757771  |

---

**Formic Acid trihydrate (12)**

|    |   |   |           |           |           |
|----|---|---|-----------|-----------|-----------|
| 1  | 1 | 0 | 1.695789  | -1.395711 | -0.116320 |
| 2  | 6 | 0 | 0.721113  | -0.899684 | -0.061059 |
| 3  | 8 | 0 | 0.630966  | 0.320272  | 0.013583  |
| 4  | 8 | 0 | -0.267116 | -1.758108 | -0.086221 |
| 5  | 1 | 0 | -1.149755 | -1.287439 | -0.037492 |
| 6  | 8 | 0 | -2.605995 | -0.585149 | 0.025004  |
| 7  | 1 | 0 | -2.472113 | 0.382353  | -0.020937 |
| 8  | 1 | 0 | -3.134513 | -0.717329 | 0.813905  |
| 9  | 1 | 0 | -0.796036 | 1.541902  | 0.064272  |
| 10 | 8 | 0 | -1.680679 | 1.936132  | 0.024640  |
| 11 | 1 | 0 | -1.649630 | 2.502454  | -0.748127 |
| 12 | 8 | 0 | 3.530534  | 0.473089  | -0.029633 |
| 13 | 1 | 0 | 2.609207  | 0.750945  | -0.077872 |
| 14 | 1 | 0 | 3.708689  | 0.531041  | 0.909944  |

---

**Formic Acid trihydrate (13)**

|    |   |   |           |           |           |
|----|---|---|-----------|-----------|-----------|
| 1  | 1 | 0 | 3.109864  | 0.355079  | 0.766667  |
| 2  | 6 | 0 | 2.091497  | 0.232043  | 0.375992  |
| 3  | 8 | 0 | 1.311138  | 1.168246  | 0.308772  |
| 4  | 8 | 0 | 1.874594  | -1.011808 | 0.019375  |
| 5  | 1 | 0 | 0.938911  | -1.116965 | -0.333433 |
| 6  | 8 | 0 | -0.543535 | -1.345506 | -0.892034 |
| 7  | 1 | 0 | -1.212365 | -1.335101 | -0.183812 |
| 8  | 1 | 0 | -0.818436 | -0.580953 | -1.410776 |
| 9  | 1 | 0 | -0.356388 | 1.393392  | -0.321794 |
| 10 | 8 | 0 | -1.266113 | 1.401678  | -0.667441 |
| 11 | 1 | 0 | -1.405017 | 2.299934  | -0.969881 |
| 12 | 1 | 0 | -2.189076 | -0.352393 | 1.872572  |
| 13 | 8 | 0 | -2.422980 | -0.511392 | 0.956917  |
| 14 | 1 | 0 | -2.241303 | 0.335002  | 0.519782  |

**Formic Acid tetrahydrate (14)**

|    |   |   |           |           |           |
|----|---|---|-----------|-----------|-----------|
| 1  | 1 | 0 | -1.626898 | 0.147998  | 0.019949  |
| 2  | 6 | 0 | -0.539933 | 0.033643  | -0.002588 |
| 3  | 8 | 0 | 0.218539  | 0.988312  | -0.099309 |
| 4  | 8 | 0 | -0.187619 | -1.233445 | 0.086538  |
| 5  | 1 | 0 | 0.811063  | -1.337141 | 0.059255  |
| 6  | 8 | 0 | 2.394376  | -1.564979 | 0.040250  |
| 7  | 1 | 0 | 2.821550  | -0.685196 | 0.072914  |
| 8  | 1 | 0 | 2.775594  | -1.988461 | -0.731026 |
| 9  | 1 | 0 | 2.094624  | 1.214855  | -0.107037 |
| 10 | 8 | 0 | 3.043581  | 1.034195  | -0.032186 |
| 11 | 1 | 0 | 3.324912  | 1.560310  | 0.718064  |
| 12 | 8 | 0 | -2.151625 | 2.690482  | 0.101364  |
| 13 | 1 | 0 | -1.222850 | 2.446337  | 0.029982  |
| 14 | 1 | 0 | -2.427587 | 2.711842  | -0.816038 |
| 15 | 1 | 0 | -2.126912 | -2.178327 | -0.090652 |
| 16 | 8 | 0 | -3.057149 | -1.937254 | -0.094292 |
| 17 | 1 | 0 | -3.264720 | -1.912567 | 0.841193  |

**Acetate Ion****Acetate ion (anhydrous):**

|   |   |   |           |           |           |
|---|---|---|-----------|-----------|-----------|
| 1 | 6 | 0 | 0.048356  | -1.349651 | 0.000000  |
| 2 | 6 | 0 | 0.000000  | 0.220978  | 0.000000  |
| 3 | 8 | 0 | 1.112474  | 0.798929  | 0.000000  |
| 4 | 8 | 0 | -1.161880 | 0.695623  | 0.000000  |
| 5 | 1 | 0 | 1.075410  | -1.728403 | 0.000000  |
| 6 | 1 | 0 | -0.485148 | -1.727987 | 0.880472  |
| 7 | 1 | 0 | -0.485148 | -1.727987 | -0.880472 |

**Acetate ion monohydrate (15)**

|    |   |   |           |           |           |
|----|---|---|-----------|-----------|-----------|
| 1  | 6 | 0 | 0.038359  | 2.127610  | 0.000000  |
| 2  | 6 | 0 | 0.000000  | 0.574666  | 0.000000  |
| 3  | 8 | 0 | -1.142299 | 0.047744  | 0.000000  |
| 4  | 8 | 0 | 1.131871  | 0.022214  | 0.000000  |
| 5  | 1 | 0 | -0.967600 | 2.555159  | 0.000000  |
| 6  | 1 | 0 | 0.589763  | 2.473428  | 0.880989  |
| 7  | 1 | 0 | 0.589763  | 2.473428  | -0.880989 |
| 8  | 1 | 0 | -0.740161 | -1.890577 | 0.000000  |
| 9  | 8 | 0 | -0.037635 | -2.559375 | 0.000000  |
| 10 | 1 | 0 | 0.682586  | -1.909756 | 0.000000  |

---

**Acetate ion dihydrate-a (16)**

|    |   |   |           |           |           |
|----|---|---|-----------|-----------|-----------|
| 1  | 6 | 0 | 0.054856  | -1.023097 | 0.314399  |
| 2  | 6 | 0 | -0.005462 | 0.511743  | 0.105940  |
| 3  | 8 | 0 | -1.143403 | 1.049120  | 0.154777  |
| 4  | 8 | 0 | 1.099138  | 1.094862  | -0.056396 |
| 5  | 1 | 0 | -0.924061 | -1.481446 | 0.168984  |
| 6  | 1 | 0 | 0.803821  | -1.467446 | -0.344659 |
| 7  | 1 | 0 | 0.374742  | -1.212440 | 1.346433  |
| 8  | 1 | 0 | -2.548503 | 0.060835  | 0.068167  |
| 9  | 1 | 0 | 2.498626  | 0.126788  | -0.276914 |
| 10 | 8 | 0 | -3.280705 | -0.551065 | -0.184364 |
| 11 | 8 | 0 | 3.253521  | -0.509969 | -0.282910 |
| 12 | 1 | 0 | -3.046370 | -0.696290 | -1.101975 |
| 13 | 1 | 0 | 3.116966  | -0.925465 | 0.569072  |

---

**Acetate ion dihydrate-b (17)**

|    |   |   |           |           |           |
|----|---|---|-----------|-----------|-----------|
| 1  | 6 | 0 | -2.651310 | -0.023502 | -0.015598 |
| 2  | 6 | 0 | -1.105892 | 0.013254  | 0.011715  |
| 3  | 8 | 0 | -0.554743 | -1.090001 | 0.264470  |
| 4  | 8 | 0 | -0.574116 | 1.126449  | -0.235325 |
| 5  | 1 | 0 | -2.975452 | -0.611768 | -0.880914 |
| 6  | 1 | 0 | -3.021464 | -0.532471 | 0.879357  |
| 7  | 1 | 0 | -3.071702 | 0.982410  | -0.082296 |
| 8  | 1 | 0 | 1.160360  | -1.369822 | 0.014796  |
| 9  | 8 | 0 | 2.122832  | -1.446453 | -0.164817 |
| 10 | 1 | 0 | 1.140893  | 1.370373  | -0.019826 |
| 11 | 1 | 0 | 2.261222  | -0.641904 | -0.670610 |
| 12 | 8 | 0 | 2.107643  | 1.436191  | 0.147189  |
| 13 | 1 | 0 | 2.236422  | 0.655191  | 0.690660  |

---

**Acetic Acid****Acetic acid (anhydrous):**

|   |   |   |           |           |           |
|---|---|---|-----------|-----------|-----------|
| 1 | 6 | 0 | 0.959736  | -0.979743 | 0.000000  |
| 2 | 6 | 0 | 0.000000  | 0.194076  | 0.000000  |
| 3 | 8 | 0 | 0.328184  | 1.349718  | 0.000000  |
| 4 | 8 | 0 | -1.321072 | -0.146306 | 0.000000  |
| 5 | 1 | 0 | 1.982081  | -0.607251 | 0.000000  |
| 6 | 1 | 0 | 0.796814  | -1.600409 | 0.885958  |
| 7 | 1 | 0 | 0.796814  | -1.600409 | -0.885958 |
| 8 | 1 | 0 | -1.391022 | -1.105231 | 0.000000  |

**Acetic acid monohydrate (18)**

|    |   |   |           |           |           |
|----|---|---|-----------|-----------|-----------|
| 1  | 6 | 0 | 2.157442  | -0.032456 | 0.018312  |
| 2  | 6 | 0 | 0.657485  | 0.094326  | 0.001691  |
| 3  | 8 | 0 | 0.060617  | 1.157735  | -0.008975 |
| 4  | 8 | 0 | 0.056811  | -1.100508 | -0.007528 |
| 5  | 1 | 0 | 2.608391  | 0.956201  | 0.077885  |
| 6  | 1 | 0 | 2.463761  | -0.644409 | 0.869195  |
| 7  | 1 | 0 | 2.484424  | -0.540864 | -0.891663 |
| 8  | 1 | 0 | -0.912595 | -0.933847 | -0.029261 |
| 9  | 8 | 0 | -2.450852 | -0.055227 | -0.080108 |
| 10 | 1 | 0 | -1.893500 | 0.736559  | -0.092365 |
| 11 | 1 | 0 | -2.972648 | 0.039142  | 0.719077  |

**Acetic acid dihydrate-a (19)**

|    |   |   |           |           |           |
|----|---|---|-----------|-----------|-----------|
| 1  | 6 | 0 | -1.025576 | 1.613743  | 0.003905  |
| 2  | 6 | 0 | 0.093262  | 0.609625  | -0.000229 |
| 3  | 8 | 0 | -0.073419 | -0.605343 | -0.020634 |
| 4  | 8 | 0 | 1.294357  | 1.179790  | 0.018694  |
| 5  | 1 | 0 | 1.962874  | 0.455149  | 0.001118  |
| 6  | 8 | 0 | 2.681675  | -1.130649 | -0.080748 |
| 7  | 1 | 0 | 1.780417  | -1.480435 | -0.102978 |
| 8  | 1 | 0 | 3.077572  | -1.541840 | 0.690121  |
| 9  | 1 | 0 | -1.982257 | -1.171991 | -0.159134 |
| 10 | 8 | 0 | -2.943875 | -1.182066 | -0.082325 |
| 11 | 1 | 0 | -3.067019 | -1.295126 | 0.861283  |
| 12 | 1 | 0 | -1.982328 | 1.096177  | -0.006752 |
| 13 | 1 | 0 | -0.930008 | 2.256059  | -0.874338 |
| 14 | 1 | 0 | -0.935271 | 2.247942  | 0.888726  |

**Acetic acid dihydrate-b (20)**

|    |   |   |           |           |           |
|----|---|---|-----------|-----------|-----------|
| 1  | 6 | 0 | 2.683509  | -0.245458 | 0.002888  |
| 2  | 6 | 0 | 1.182499  | -0.105915 | -0.008407 |
| 3  | 8 | 0 | 0.424675  | -1.062477 | -0.077424 |
| 4  | 8 | 0 | 0.803093  | 1.161744  | 0.067847  |
| 5  | 1 | 0 | 2.956983  | -1.295615 | -0.079364 |
| 6  | 1 | 0 | 3.107517  | 0.323836  | -0.827115 |
| 7  | 1 | 0 | 3.078047  | 0.177027  | 0.929744  |
| 8  | 1 | 0 | -0.190349 | 1.226712  | 0.063783  |
| 9  | 8 | 0 | -1.833632 | 1.419387  | 0.052777  |
| 10 | 1 | 0 | -2.216781 | 0.520555  | 0.080637  |
| 11 | 1 | 0 | -2.216162 | 1.811528  | -0.734002 |
| 12 | 1 | 0 | -1.397062 | -1.320248 | -0.117430 |
| 13 | 8 | 0 | -2.360109 | -1.217129 | -0.043652 |
| 14 | 1 | 0 | -2.590455 | -1.747755 | 0.720485  |

---

**Methylammonium ion****Methylammonium ion (anhydrous)**

|   |   |   |           |           |           |
|---|---|---|-----------|-----------|-----------|
| 1 | 7 | 0 | 0.000000  | 0.000000  | 0.710080  |
| 2 | 6 | 0 | 0.000000  | 0.000000  | -0.794371 |
| 3 | 1 | 0 | 0.000000  | 0.955613  | 1.073744  |
| 4 | 1 | 0 | 0.000000  | -1.032681 | -1.141855 |
| 5 | 1 | 0 | 0.827585  | -0.477806 | 1.073744  |
| 6 | 1 | 0 | -0.894328 | 0.516341  | -1.141855 |
| 7 | 1 | 0 | -0.827585 | -0.477806 | 1.073744  |
| 8 | 1 | 0 | 0.894328  | 0.516341  | -1.141855 |

---

**Methylammonium ion monohydrate (21)**

|    |   |   |           |           |           |
|----|---|---|-----------|-----------|-----------|
| 1  | 7 | 0 | -0.957724 | 0.150626  | 0.000000  |
| 2  | 6 | 0 | -0.845742 | -1.343914 | 0.000000  |
| 3  | 1 | 0 | 0.000000  | 0.582801  | 0.000000  |
| 4  | 1 | 0 | -1.843446 | -1.778300 | 0.000000  |
| 5  | 1 | 0 | -1.464475 | 0.485066  | 0.821917  |
| 6  | 1 | 0 | -0.297792 | -1.641764 | -0.891477 |
| 7  | 1 | 0 | -1.464475 | 0.485066  | -0.821917 |
| 8  | 1 | 0 | -0.297792 | -1.641764 | 0.891477  |
| 9  | 8 | 0 | 1.611059  | 0.996250  | 0.000000  |
| 10 | 1 | 0 | 2.129014  | 1.274000  | -0.760688 |
| 11 | 1 | 0 | 2.129014  | 1.274000  | 0.760688  |

---



**Methylammonium ion dihydrate (22)**

|    |   |   |           |           |           |
|----|---|---|-----------|-----------|-----------|
| 1  | 7 | 0 | -0.000592 | 0.398277  | 0.555005  |
| 2  | 6 | 0 | 0.001080  | 1.590485  | -0.343308 |
| 3  | 1 | 0 | 0.002017  | 0.677221  | 1.536357  |
| 4  | 1 | 0 | -0.005878 | 1.237013  | -1.372225 |
| 5  | 1 | 0 | 0.850144  | -0.175131 | 0.381121  |
| 6  | 1 | 0 | -0.889586 | 2.184480  | -0.148088 |
| 7  | 1 | 0 | -0.854428 | -0.171497 | 0.384013  |
| 8  | 1 | 0 | 0.899665  | 2.175181  | -0.156604 |
| 9  | 8 | 0 | 2.368157  | -0.848042 | -0.107014 |
| 10 | 1 | 0 | 2.511019  | -1.557093 | -0.739104 |
| 11 | 1 | 0 | 3.199826  | -0.783901 | 0.369699  |
| 12 | 8 | 0 | -2.368224 | -0.849010 | -0.108312 |
| 13 | 1 | 0 | -3.212254 | -0.743979 | 0.338473  |
| 14 | 1 | 0 | -2.502327 | -1.596733 | -0.696220 |

**Methylammonium ion trihydrate (23)**

|    |   |   |           |           |           |
|----|---|---|-----------|-----------|-----------|
| 1  | 7 | 0 | 0.000000  | 0.000000  | 0.117636  |
| 2  | 6 | 0 | 0.000000  | 0.000000  | 1.605809  |
| 3  | 1 | 0 | 0.038743  | 0.972816  | -0.231403 |
| 4  | 1 | 0 | -0.111829 | -1.023590 | 1.958646  |
| 5  | 1 | 0 | 0.823112  | -0.519960 | -0.231403 |
| 6  | 1 | 0 | -0.830540 | 0.608642  | 1.958646  |
| 7  | 1 | 0 | -0.861854 | -0.452856 | -0.231403 |
| 8  | 1 | 0 | 0.942369  | 0.414948  | 1.958646  |
| 9  | 8 | 0 | 2.368534  | -1.367474 | -0.484859 |
| 10 | 1 | 0 | 3.093235  | -1.080576 | -1.045577 |
| 11 | 1 | 0 | 2.571915  | -2.285125 | -0.288892 |
| 12 | 8 | 0 | -2.368534 | -1.367474 | -0.484859 |
| 13 | 1 | 0 | -2.482424 | -2.138532 | -1.045577 |
| 14 | 1 | 0 | -3.264934 | -1.084782 | -0.288892 |
| 15 | 8 | 0 | 0.000000  | 2.734948  | -0.484859 |
| 16 | 1 | 0 | -0.610811 | 3.219108  | -1.045577 |
| 17 | 1 | 0 | 0.693018  | 3.369906  | -0.288892 |

**Methylamine****Methylamine (anhydrous)**

|   |   |   |           |           |           |
|---|---|---|-----------|-----------|-----------|
| 1 | 7 | 0 | -0.052349 | -0.761653 | 0.000000  |
| 2 | 6 | 0 | -0.052349 | 0.704340  | 0.000000  |
| 3 | 1 | 0 | 0.942747  | 1.172070  | 0.000000  |
| 4 | 1 | 0 | 0.461895  | -1.094394 | 0.808436  |
| 5 | 1 | 0 | 0.461895  | -1.094394 | -0.808436 |
| 6 | 1 | 0 | -0.592997 | 1.061125  | -0.879756 |
| 7 | 1 | 0 | -0.592997 | 1.061125  | 0.879756  |

**Methylamine monohydrate (24)**

|    |   |   |           |           |           |
|----|---|---|-----------|-----------|-----------|
| 1  | 7 | 0 | 0.785564  | 0.745208  | 0.043541  |
| 2  | 6 | 0 | 1.199501  | -0.662942 | -0.026306 |
| 3  | 1 | 0 | 2.258148  | -0.813913 | -0.270037 |
| 4  | 1 | 0 | 1.008029  | 1.211694  | -0.829930 |
| 5  | 1 | 0 | 1.310614  | 1.227096  | 0.765279  |
| 6  | 1 | 0 | 0.996955  | -1.135693 | 0.937319  |
| 7  | 1 | 0 | 0.584852  | -1.168670 | -0.772083 |
| 8  | 1 | 0 | -1.119758 | 0.413415  | 0.039173  |
| 9  | 8 | 0 | -1.958736 | -0.056930 | -0.094388 |
| 10 | 1 | 0 | -2.064909 | -0.517295 | 0.738439  |

**Methylamine dihydrate (25)**

|    |   |   |           |           |           |
|----|---|---|-----------|-----------|-----------|
| 1  | 7 | 0 | -1.076687 | 0.150396  | 0.707604  |
| 2  | 6 | 0 | -1.757804 | -0.198052 | -0.546422 |
| 3  | 1 | 0 | -2.470069 | -1.026929 | -0.452608 |
| 4  | 1 | 0 | -0.530851 | -0.652905 | 1.009123  |
| 5  | 1 | 0 | -1.757736 | 0.355011  | 1.430367  |
| 6  | 1 | 0 | -2.288789 | 0.676164  | -0.929773 |
| 7  | 1 | 0 | -0.997172 | -0.480940 | -1.275587 |
| 8  | 1 | 0 | 0.334646  | 1.194658  | 0.172481  |
| 9  | 8 | 0 | 1.195126  | 1.403039  | -0.252310 |
| 10 | 1 | 0 | 1.622653  | 1.995209  | 0.367982  |
| 11 | 8 | 0 | 1.425974  | -1.368159 | 0.103813  |
| 12 | 1 | 0 | 1.555244  | -0.423449 | -0.077058 |
| 13 | 1 | 0 | 1.646909  | -1.780312 | -0.731656 |

---
